# Supplementary material
Source: PubMed Central journal article supplement (PMC2206297)
Supplement: bmj_39412.525243.BE_1.pdf [file bmj_39412.525243.BE_1.pdf]

## References to studies included in the review (web only)

- W1. Close J, Ellis M, Hooper R, et al. Prevention of falls in the elderly trial (PROFET): a randomised controlled trial. *Lancet* 1999;353:93-97.
- W2. Coleman EA, Grothaus LC, Sandhu N, Wagner EH. Chronic care clinics: a randomized controlled trial of a new model of primary care for older frail adults. *J Am Geriatr Soc* 1999;47:775-783.
- W3. Davison J, Bond J, Dawson P, Steen IN, Kenny RA. Patients with recurrent falls attending accident & emergency benefit from multifactorial intervention -- a randomised controlled trial. *Age and Ageing* 2005;34(2):162-8.
- W4. Fabacher D, Josephson K, Pietruszka F, Linderborn K, Morley JE, Rubenstein LZ. An in-home preventive assessment program for independent older adults: a randomized controlled trial. *J Am Geriatr Soc* 1994;42:630-638.
- W5. Gallagher EM, Brunt H. Head over heels: impact of a health promotion program to reduce falls in the elderly. *Can J Aging* 1996;15(1):84-96.
- W6. Gill TM, Baker DI, Gottschalk M, Peduzzi PN, Allore H, Byers A. A program to prevent functional decline in physically frail, elderly persons who live at home. *N Engl J Med* 2002;347(14):1068-1074.
- W7. Hogan DA, MacDonald FA, Betts J, Bricker S, Eby EM, Delarue B, et al. A randomized controlled trial of a community-based consultation service to prevent falls. *CMAJ* 2001;165(5):537-543.
- W8. Huang T-T, Acton GJ. Effectiveness of home visit falls prevention strategy for Taiwanese community-dwelling elders: randomized trial. *Public Health Nursing* 2004;21(3):247-56.
- W9. Jitapunkul S. A randomised controlled trial of regular surveillance of a Thai elderly using a simple questionnaire administered by non-professional personnel. *Journal of the Medical Association of Thailand* 1998;81(5):352-356.
- W10. Lightbody E, Watkins C, Leathley M, Sharma A, Lye M. Evaluation of a nurse-led falls prevention programme versus usual care: a randomized controlled trial. *Age and Ageing* 2002;31:203-210.

- W11. Lord SR, Tiedemann A, Chapman K, Munro B, Murray SM, et al. The effect of an individualized fall prevention program on fall risk and falls in older people: a randomized, controlled trial. *J Am Geriatr Soc* 2005;53(8):1296-304.
- W12. Newbury J, Marley JE, Beilby JJ. A randomised controlled trial of the outcome of health assessment of people aged 75 years and over. *Med J Aus* 2001;175:104-107.
- W13. Pardessus V, Puisieux F, BDi Pompeo C, Gaudefroy C, Thevenon A, Dewailly P. Benefits of home visits for falls and autonomy in the elderly. A randomized trial study. *Am J Phys Med Rehabil* 2002;81(4):247-252.
- W14. Rubenstein LZ, Alessi CA, Josephson KR, Trinidad Hoyle M, Harker JO, Pietruszka FM. A randomized trial of a screening, case finding, and referral system for older veterans in primary care. *J Am Geriatr Soc* 2007; 55: 166-174.
- W15. Shaw FE, Bond J, Richardson DA, Dawson P, Steen IN, McKeith IG, et al. Multifactorial intervention after a fall in older people with cognitive impairment and dementia presenting to the accident and emergency department: randomised controlled trial. *BMJ* 2003;326(7380):73-.
- W16. Tinetti ME, Baker DI, McAvay G, Claus EB, Garrett P, Gottschalk M, et al. A multifactorial intervention to reduce the risk of falling among elderly people living in the community. *N Engl J Med* 1994;331(13):821-827.
- W17. Van Haastregt JCM, Diedericks JPM, van Rossum E, de Witte LP, Voorhoeve PM, Crebolder HFJM. Effects of a programme of multifactorial home visits on falls and mobility impairments in elderly people at risk: randomised controlled trial. *BMJ* 2000;321:994-998.
- W18. Wagner EH, LaCroix AZ, Grothaus LC, Leveille SG, Hecht JA, Artz K, et al. Preventing disability and falls in older adults: a population-based randomized trial. *Am J Public Health* 1994;84(11):1800-1806.
- W19. Whitehead C, Wundke R, Crotty M, Finucane P. Evidence-based clinical practice in falls prevention: a randomised controlled trial of a falls prevention service. *Aust Health Rev* 2003;26(3):88-97.

## References to studies excluded from the review (web only)

- W20. Barr RJ, Stewart A, Torgerson DJ, Seymour DG, Reid DM. Screening elderly women for risk of future fractures - Participation rates and impact on incidence of falls and fractures. *Calcif Tissue Int* 2005;76(4):243-248.
- W21. Campbell AJ, Robertson MC, La Grow SJ, Kerse NM, Sanderson GF, Jacobs RJ, et al. Randomised controlled trial of prevention of falls in people aged  $\geq 75$  with severe visual impairment: The VIP trial. *BMJ* 2005;331(7520):817-820.
- W22. Clemson L, Cumming RG, Kendig H, Swann M, Heard R, Taylor K. The effectiveness of a community-based program for reducing the incidence of falls in the elderly: a randomized trial. *J Am Geriatr Soc* 2004;52(9):1487-94.
- W23. Crome P, Hill S, Mossman J, Stockdale P. A randomised controlled trial of a nurse-led falls prevention clinic (abstract). *J Am Geriatr Soc* 2000;48(8):S78.
- W24. Cumming RG, Thomas M, Szonyi G, Salkeld G, O'Neill E, Westbury C. Home visits by an occupational therapist for assessment and modification of environmental hazards: a randomized trial of falls prevention. *J Am Geriatr Soc* 1999;47(12):1397-1402.
- W25. Day L, Fildes B, Gordon I, Fitzharris M, Flamer H, Lord S. Randomised factorial trial of falls prevention among older people living on their own homes. *BMJ* 2002;325:128-131.
- W26. Gitlin LN, Winter L, Dennis MP, Corcoran M, Schinfeld S, Hauck WW. A randomized trial of a multicomponent home intervention to reduce functional difficulties in older adults. *J Am Geriatr Soc* 2006;54(5):809-816.
- W27. Haines TP, Bennell KL, Osborne RH, Hill KD. Effectiveness of targeted falls prevention programme in subacute hospital setting: randomised controlled trial. *BMJ* 2004;328(7441):676-9.
- W28. Hall N, De Beck P, Johnson D, Mackinnon K, Gutman G, Glick N. Randomized trial of a prevention program for frail elders. *Can J Aging* 1992;11:72-91.
- W29. Hebert R, Robichaud L, Roy PM, Bravo G, Voyer L. Efficacy of a nurse-led multidimensional preventive programme for older people at risk of functional decline. A randomized controlled trial. *Age and Ageing* 2001;30:147-153.

- W30. Hendriks MRC, van Haastregt JCM, Diederiks JPM, Evers S, Crebolder H, van Eijk JTM. Effectiveness and cost-effectiveness of a multidisciplinary intervention programme to prevent new falls and functional decline among elderly persons at risk: design of a replicated randomised controlled trial ISRCTN64716113. *BMC Public Health* 2005;5.
- W31. Hornbrook MC, Stevens VJ, Wingfield DJ, Hollis JF, Greenlick MR, Ory MG. Preventing falls among community-dwelling older persons: results from a randomized trial. *Gerontologist* 1994;34:16-23.
- W32. Kingston P, Jones M, Lally F, Crome P. Older people and falls: a randomized controlled trial of a health visitor (HV) intervention. *Rev Clin Gerontol* 2001;11:209-214.
- W33. Masud T, Coupland C, Drummond A, Gladman J, Kendrick D, Sach T, Harwood R, Kumar P, Morris R, Taylor R, Youde J, Conroy S. Multifactorial day hospital intervention to reduce falls in high risk older people in primary care: a multi-centre randomised controlled trial [ISRCTN 46584556]. *Trials* 2006; 7: 5.
- W34. McEwan RT, Davison N, Forster DP, Pearson P, Stirling E. Screening elderly people in primary care: a randomized controlled trial. *Br J Gen Pract* 1990;40:94-97.
- W35. Nikolaus T, Bach M. Preventing falls in community-dwelling frail older people using a home intervention team (HIT): results from the Randomized Falls-HIT Trial. *J Am Geriatr Soc* 2003;51(3):300-5.
- W36. Reuben DB, Frank JC, Hirsch SH, McGuigan KA, Maly RC. A randomized clinical trial of outpatient comprehensive geriatric assessment coupled with an intervention to increase adherence to recommendations. *J Am Geriatr Soc* 1999;47:269-276.
- W37. Robson E, Edwards J, Gallagher E, Baker D. Steady as you go (SAYGO): A falls-prevention program for seniors living in the community. *Can J Aging* 2003;22(2):207-216.
- W38. Rubenstein LZ, Robbins AS, Josephson KR, Schulman BL, Osterweil D. The value of assessing falls in an elderly population. *Ann Intern Med* 1990;113:308-316.
- W39. Steadman J, Donaldson N, Kalra L. A randomized controlled trial of an enhanced balance training program to improve mobility and reduce falls in elderly patients. *J Am Geriatr Soc* 2003;51(6):847-52.

- W40. Steinberg M, Cartwright C, Peel N, Williams G. A sustainable programme to prevent falls and near falls in community dwelling older people: results of a randomised trial. *J Epidemiol Community Health* 2000;54:227-232.
- W41. Stenvall M, Olofsson B, Lundstrom M, Englund U, Borssen B, Svensson O, Nyberg L, Gustafson Y. A multidisciplinary, multifactorial intervention program reduced postoperative falls and injuries after femoral neck fracture. *Osteoporos Int* 2007; 18: 167-175.
- W42. Stevens M, Holman CDJ, Bennett N, de Klerk N. Preventing falls in older people: outcome evaluation of a randomized controlled trial. *J Am Geriatr Soc* 2001;49:1448-1455.
- W43. van Rossum E, Frederiks CMA, Philipsen H, Portengen K, Wiskerke J, Knipschild P. Effects of preventive home visits to elderly people. *BMJ* 1993;307:27-32.
- W44. Yates SM, Dunnagan TM. Evaluating the effectiveness of a home-based fall risk reduction program for rural community dwelling older adults. *J Gerontol Med Sci* 2001;56A(4):M226-M230.
